# Supplementary material
Source: Springer Nature journal article supplement (https://www.springermedizin.de/resource/supplementary/12936_2012_2126_MOESM3_ESM.pdf/9542656)
Supplement: MOESM3 [file 9542656]

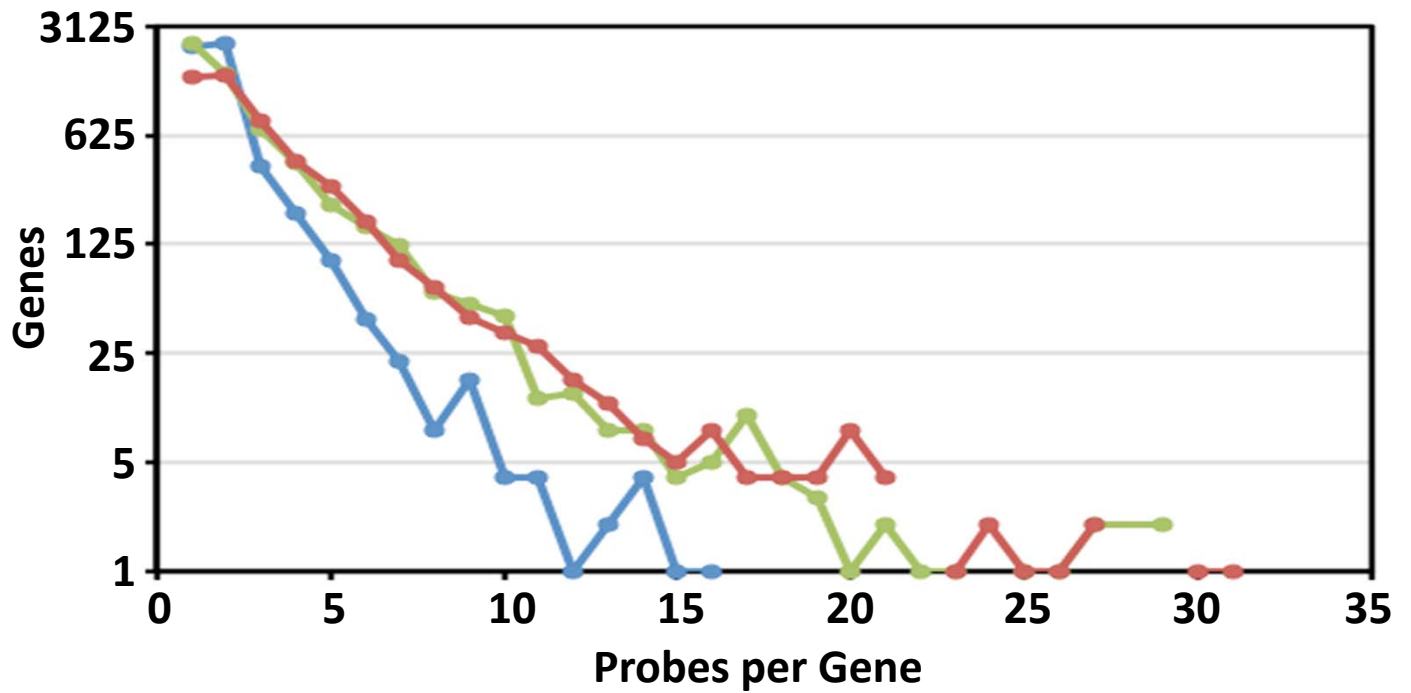

**Additional File 3. Probes Per Gene.** *P. falciparum* spotted 70mer array (blue), the *P. falciparum* Agilent 8x15K array (green), and the *P. berghei* Agilent 8x15K array (red).
